# Supplementary material for: Effect of nanocavities on the torsional dynamics of thioflavin T in various non-aqueous reverse micelles
Source: Royal Society of Chemistry journal article supplement (doi:10.1039/c2pp25297j), 2012-10-02
Supplement: c2pp25297j.pdf [file c2pp25297j.pdf]

## Supporting information

### **Effect of Nanocavity on the Torsional dynamics of Thioflavin T in Various Non-aqueous Reverse Micelles**

Aninda Chatterjee and Debabrata Seth\*

Department of Chemistry,  
Indian Institute of Technology,  
Patna 800013, Bihar, INDIA

E-mail : debabrata@iitp.ac.in; Fax : 91-612-2277383

Table S-1:

The absorption, emission peak and emission quantum yields of ThT in glycerol-methanol mixtures.

| Sr no | System           | $\lambda_{\max}^{abs}$ (nm) | $\lambda_{\max}^{emi}$ (nm) | $\Phi_f$               | Viscosity (cP) |
|-------|------------------|-----------------------------|-----------------------------|------------------------|----------------|
| 1.    | ThT+20% glycerol | 417                         | 478                         | $5.741 \times 10^{-4}$ | 4.8            |
| 2.    | ThT+25% glycerol | 417                         | 479                         | $6.15 \times 10^{-4}$  | 6.0            |
| 3.    | ThT+30% glycerol | 417                         | 481                         | $7.23 \times 10^{-4}$  | 7.7            |
| 4.    | ThT+35% glycerol | 419                         | 482                         | $8.36 \times 10^{-4}$  | 10             |
| 5.    | ThT+40% glycerol | 418                         | 484                         | $1.22 \times 10^{-3}$  | 13             |
| 6.    | ThT+45% glycerol | 419                         | 484                         | $1.32 \times 10^{-3}$  | 18             |
| 7.    | ThT+50% glycerol | 419                         | 483                         | $1.703 \times 10^{-3}$ | 28             |
| 8.    | ThT+55% glycerol | 419                         | 485                         | $2.05 \times 10^{-3}$  | 36             |
| 9.    | ThT+60% glycerol | 420                         | 485                         | $2.6 \times 10^{-3}$   | 58             |
| 10.   | ThT+65% glycerol | 420                         | 486                         | $3.6 \times 10^{-3}$   | 70             |
| 11.   | ThT+70% glycerol | 420                         | 486                         | $5.8 \times 10^{-3}$   | 130            |
| 12.   | ThT+75% glycerol | 421                         | 487                         | $7.5 \times 10^{-3}$   | 170            |
| 13.   | ThT+80% glycerol | 420                         | 487                         | 0.0106                 | 250            |
| 14.   | ThT+85% glycerol | 422                         | 487                         | 0.013                  | 350            |
| 15.   | ThT+90% glycerol | 422                         | 487                         | 0.018                  | 630            |

Table S-2:

The absorption and emission property of ThT molecule in different dioxane-water mixtures

| Sr no | System           | $\lambda_{\max}^{abs}$ (nm) | Absorption energy <sup>#</sup><br>$E_a$ (Kcal mol <sup>-1</sup> ) | $\lambda_{\max}^{emi}$ (nm) | Emission energy <sup>#</sup><br>$E_f$ (Kcal mol <sup>-1</sup> ) | $\Phi_f$              | $E_T$ (30) |
|-------|------------------|-----------------------------|-------------------------------------------------------------------|-----------------------------|-----------------------------------------------------------------|-----------------------|------------|
| 1     | ThT+dioxane      | 411                         | 69.56                                                             | 475                         | 60.19                                                           | $2.08 \times 10^{-3}$ | 36.6       |
| 2     | ThT+99.1%dioxane | 411                         | 69.56                                                             | 478                         | 59.81                                                           | $1.46 \times 10^{-3}$ | 38.5       |
| 3     | ThT+97.2%dioxane | 414                         | 69.06                                                             | 480                         | 59.56                                                           | $1.28 \times 10^{-3}$ | 42.0       |
| 4     | ThT+95.3%dioxane | 414                         | 69.06                                                             | 481                         | 59.44                                                           | $1.18 \times 10^{-3}$ | 43.2       |
| 5     | ThT+92.5%dioxane | 418                         | 68.40                                                             | 483                         | 59.19                                                           | $9.95 \times 10^{-4}$ | 45.6       |
| 6     | ThT+81.3%dioxane | 421                         | 67.91                                                             | 484                         | 59.07                                                           | $7.26 \times 10^{-4}$ | 48.7       |
| 7     | ThT+71.9%dioxane | 421                         | 67.91                                                             | 485                         | 58.95                                                           | $6.97 \times 10^{-4}$ | 50.5       |
| 8     | ThT+57.8%dioxane | 421                         | 67.91                                                             | 486                         | 58.83                                                           | $6.58 \times 10^{-4}$ | 52.6       |
| 9     | ThT+43.2%dioxane | 421                         | 67.91                                                             | 486                         | 58.83                                                           | $5.51 \times 10^{-4}$ | 54.9       |
| 10    | ThT+34.4%dioxane | 420                         | 68.07                                                             | 486                         | 58.83                                                           | $4.55 \times 10^{-4}$ | 56.5       |
| 11    | ThT+25.3%dioxane | 418                         | 68.40                                                             | 485                         | 58.95                                                           | $4.13 \times 10^{-4}$ | 57.9       |
| 12    | ThT+11%dioxane   | 416                         | 68.73                                                             | 484                         | 59.07                                                           | $2.79 \times 10^{-4}$ | 60.9       |
| 13    | ThT+6.2%dioxane  | 414                         | 69.06                                                             | 483                         | 59.19                                                           | $2.64 \times 10^{-4}$ | 62.8       |
| 14    | ThT+water        | 412                         | 69.39                                                             | 481                         | 59.44                                                           | $2.04 \times 10^{-4}$ | 63.6       |

$$^{\#}E \text{ (Kcalmol}^{-1}\text{)} = 28590 / (\lambda_{\max}/\text{nm}).$$

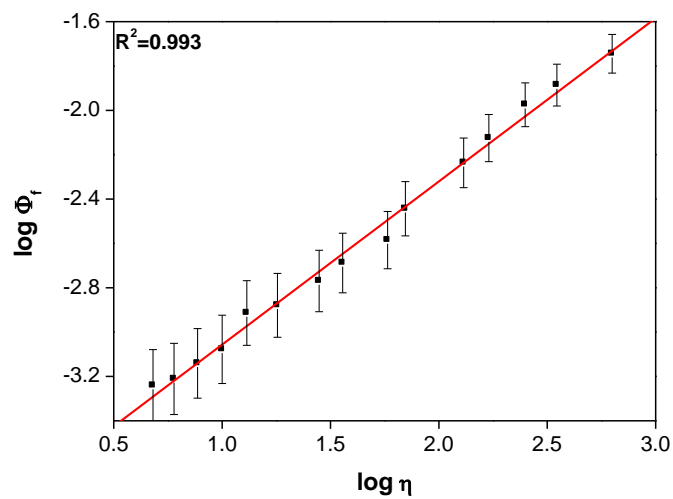

**Fig. S 1:** The  $\log \phi_f$  vs  $\log \eta$  plot for ThT in glycerol-methanol mixtures.

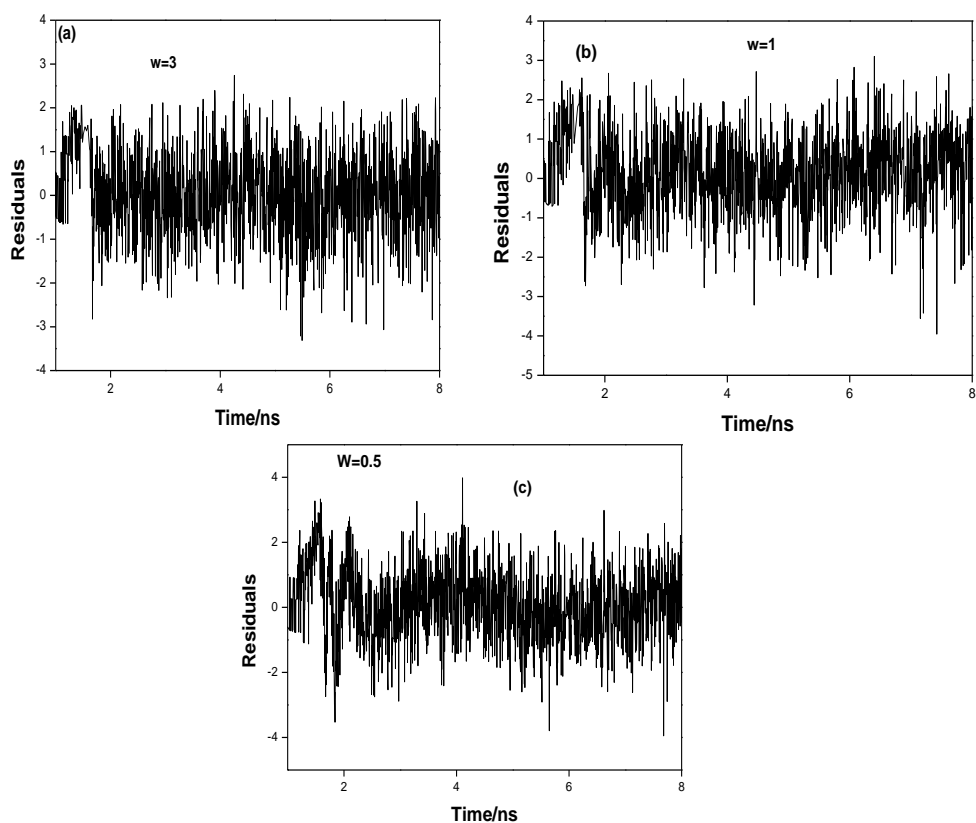

**Fig. S 2:** Residual for the fitted fluorescence lifetime decay ThT in (a) glycerol/AOT/isooctane reverse micelle at  $w = 3$  (b) ethylene glycol/AOT/isooctane reverse micelle at  $w = 1$  and (c) DMF/AOT/isooctane reverse micelle at  $w = 0.5$ .
